# Supplementary material
Source: Elsevier journal article supplement (https://lshtm-eprints-repo-prod.lshtm-eprints.cdl.cosector.com/62146/1/mmc1.pdf)
Supplement: mmc1 [file mmc1.pdf]

# THE LANCET

## **Supplementary appendix**

This appendix formed part of the original submission and has been peer reviewed. We post it as supplied by the authors.

Supplement to: Manaseki-Holland S, Maroof Z, Bruce J, et al. Effect on the incidence of pneumonia of vitamin D supplementation by quarterly bolus dose to infants in Kabul: a randomised controlled superiority trial. *Lancet* 2012; published online April 10. DOI:10.1016/S0140-6736(11)61650-4.

Web only tables:

**Table 1: Incidence rate of first or the only episode of pneumonia per protocol analysis.**

| Type of Pneumonia                          | <u>Vitamin D</u> |                            |                   |               | <u>Placebo</u> |                            |                   |               | Incidence     |             | P-Value |
|--------------------------------------------|------------------|----------------------------|-------------------|---------------|----------------|----------------------------|-------------------|---------------|---------------|-------------|---------|
|                                            | Episode          | Person<br>years<br>at risk | Incidence<br>Rate | 95% CI        | Episode        | Person<br>years<br>at risk | Incidence<br>Rate | 95% CI        | Rate<br>Ratio | 95% CI      |         |
| <b>x-ray confirmed</b>                     |                  |                            |                   |               |                |                            |                   |               |               |             |         |
| All Pneumonia                              | 230              | 1620                       | 0.14              | 0.12 - 0.16   | 219            | 1625                       | 0.13              | 0.12- 0.15    | 1.06          | 0.88 – 1.27 | 0.54    |
| Simple Pneumonia                           | 201              | 1650                       | 0.12              | 0.11 - 0.14   | 195            | 1652                       | 0.11              | 0.10 - 0.14   | 1.03          | 0.85 – 1.26 | 0.71    |
| Severe Pneumonia                           | 44               | 1787                       | 0.024             | 0.018 - 0.033 | 36             | 1794                       | 0.020             | 0.014 - 0.028 | 1.23          | 0.79 – 1.91 | 0.35    |
| Very Severe diseases                       | 12               | 1819                       | 0.006             | 0.003 - 0.012 | 9              | 1815                       | 0.005             | 0.002 - 0.009 | 1.33          | 0.56 – 3.17 | 0.51    |
| <b>x-ray confirmed &amp; non-confirmed</b> |                  |                            |                   |               |                |                            |                   |               |               |             |         |
| All Pneumonia                              | 915              | 910                        | 1.01              | 0.94 - 1.07   | 922            | 895                        | 1.03              | 0.96 - 1.09   | 0.98          | 0.89 – 1.07 | 0.68    |
| Simple Pneumonia                           | 902              | 949                        | 0.95              | 0.89 - 1.01   | 885            | 947                        | 0.93              | 0.87 – 0.99   | 1.02          | 0.93 – 1.12 | 0.67    |
| Severe Pneumonia                           | 148              | 1678                       | 0.09              | 0.07 - 0.10   | 135            | 1697                       | 0.08              | 0.07 - 0.09   | 1.11          | 0.88 – 1.40 | 0.38    |
| Very Severe diseases                       | 135              | 1724                       | 0.08              | 0.06 - 0.09   | 155            | 1704                       | 0.09              | 0.07 - 0.11   | 0.86          | 0.68 – 1.08 | 0.21    |

**Table 2: Person-time at risk and incidence rate of repeat episodes of pneumonia from all sources (home visit, OPD and IPD) per protocol analysis**

| Type of Pneumonia                          | <u>Vitamin D</u> |                            |                   |               | <u>Placebo</u> |                            |                   |               | Incidence<br>Rate<br>Ratio | 95% CI      | P-Value |
|--------------------------------------------|------------------|----------------------------|-------------------|---------------|----------------|----------------------------|-------------------|---------------|----------------------------|-------------|---------|
|                                            | Episode          | Person<br>years<br>at risk | Incidence<br>Rate | 95% CI        | Episode        | Person<br>years<br>at risk | Incidence<br>Rate | 95% CI        |                            |             |         |
| <b>x-ray confirmed</b>                     |                  |                            |                   |               |                |                            |                   |               |                            |             |         |
| All Pneumonia                              | 125              | 1828                       | 0.07              | 0.06 - 0.08   | 74             | 1824                       | 0.04              | 0.03 - 0.05   | 1.69                       | 1.27 – 2.25 | <0.0001 |
| Simple Pneumonia                           | 88               | 1828                       | 0.05              | 0.04-0.06     | 47             | 1824                       | 0.03              | 0.02 - 0.04   | 1.87                       | 1.31 – 2.67 | <0.0001 |
| Severe Pneumonia                           | 10               | 1828                       | 0.005             | 0.003 - 0.010 | 6              | 1824                       | 0.003             | 0.001 - 0.007 | 1.67                       | 0.61 – 4.59 | 0.31    |
| Very Severe diseases                       | 0                | 1828                       | 0                 | n/a           | 0              | 1824                       | 0                 | n/a           | n/a                        | n/a         | n/a     |
| <b>x-ray confirmed &amp; non-confirmed</b> |                  |                            |                   |               |                |                            |                   |               |                            |             |         |
| All Pneumonia                              | 2134             | 1826                       | 1.17              | 1.12 – 1.22   | 1977           | 1822                       | 1.08              | 1.04 – 1.13   | 1.08                       | 1.01 – 1.14 | 0.02    |
| Simple Pneumonia                           | 1779             | 1826                       | 0.97              | 0.93 – 1.02   | 1645           | 1822                       | 0.90              | 0.86 – 0.94   | 1.08                       | 1.01 – 1.15 | 0.02    |
| Severe Pneumonia                           | 44               | 1826                       | 0.024             | 0.017 – 0.032 | 42             | 1822                       | 0.023             | 0.017 – 0.031 | 1.04                       | 0.68 – 1.59 | 0.84    |
| Very Severe diseases                       | 41               | 1826                       | 0.022             | 0.016 – 0.030 | 37             | 1822                       | 0.020             | 0.014 – 0.028 | 1.10                       | 0.71 – 1.72 | 0.66    |

**Table 3: Serum levels of 25-hydroxvvitamin D measured at different stages in samples of study children.**

| Timing of sample to supplementation                   | Month of sample | Intervention 25(OH)D serum concentrations |               | Control serum 25(OH)D concentrations |               |
|-------------------------------------------------------|-----------------|-------------------------------------------|---------------|--------------------------------------|---------------|
|                                                       |                 | Mean nmol/L                               | 95% CI nmol/L | Mean nmol/L                          | 95% CI nmol/L |
| 1 week after first dose<br>n=139                      | Nov-Dec<br>2007 | 129.5***                                  | (111.1-148.0) | 42.9#                                | (38.7-47.0)   |
| 1.5 months after first dose<br>n=133                  | Dec-Jan<br>2008 | 76.3***                                   | (64.5-88.2)   | 33.0                                 | (28.0-38.0)   |
| 3 months after dose 1 and<br>just before dose 2 n=122 | Feb-Mar<br>2008 | 55.5*                                     | (46.0-65.0)   | 39.6                                 | (28.5-50.7)   |
| 2 weeks after 3 <sup>rd</sup> dose<br>n=141           | May-Jun<br>2008 | 104.9***                                  | (89.8-120.0)  | 52.9                                 | (45.3-60.6)   |
| 4 months after dose 6<br>n=101                        | Jul-Aug<br>2009 | 51.9                                      | (49.0-54.9)   | 50.1                                 | (45.0-55.1)   |

# This represents the baseline 25-hydroxvvitamin D levels in the study population

\*\*\* Statistically different between the groups p<0.001

\* Statistically different between the groups p=0.06
